# Supplementary material for: Acid–base equilibria of various oxidation states of aqua–ruthenium complexes with 1,10-phenanthroline-5,6-dione in aqueous media
Source: Royal Society of Chemistry journal article supplement (doi:10.1039/b312310c), 2004-01-01
Supplement: b312310c.pdf [file b312310c.pdf]

## Electronic Supplementary Information

**Manuscript Number:** B312310C

**Title:** Acid-base equilibria of various oxidation states of aqua-ruthenium complexes with 1,10-phenanthroline-5,6-dione in aqueous media

**Authors:** Tetsuaki Fujihara, Tohru Wada and Koji Tanaka\*

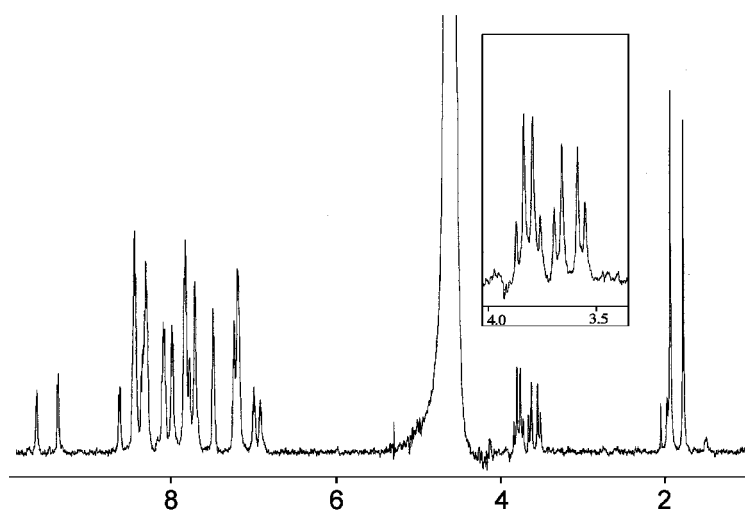

**Fig. S1.**  $^1\text{H}$  NMR spectrum of  $[\mathbf{1}](\text{ClO}_4)_2$  in  $\text{D}_2\text{O}$ .

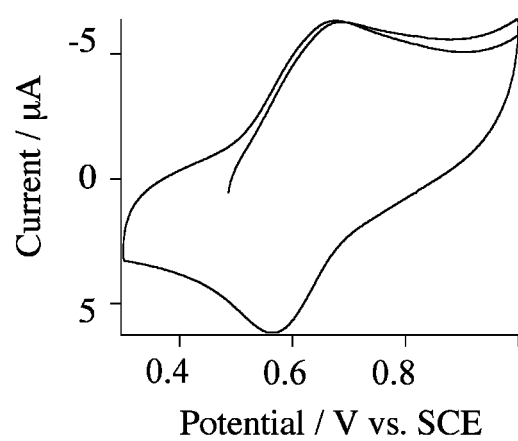

**Fig. S2.** Cyclic voltammogram of  $[1](\text{ClO}_4)_2$  in  $0.1 \text{ mol dm}^{-3}$  phosphate buffer (pH 6.37).

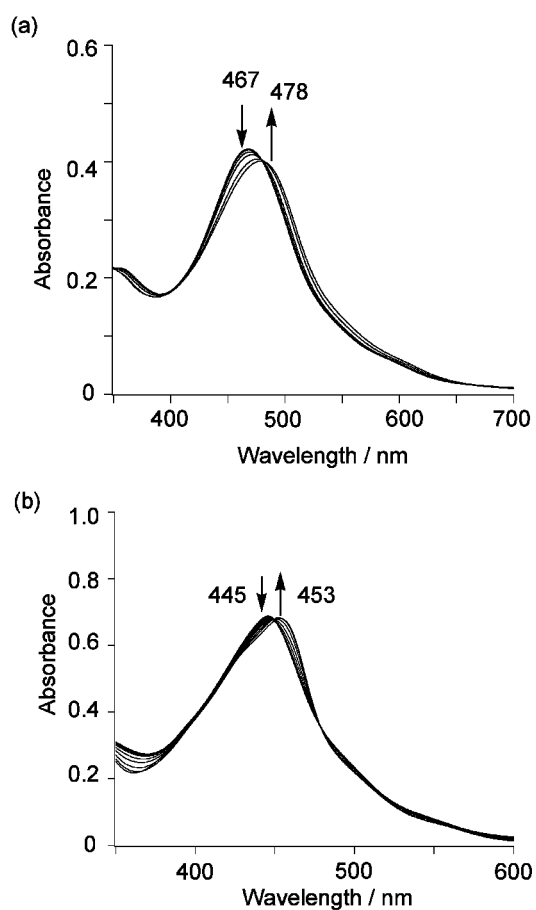

**Fig. S3.** pH Dependent UV-vis spectra of  $[2]^{2+}$  in  $H_2O$  (a) and that in  $CH_3CN/H_2O$  (1:9 v/v) (b). The arrows in the figure indicate the direction of the changes by increasing of pH.

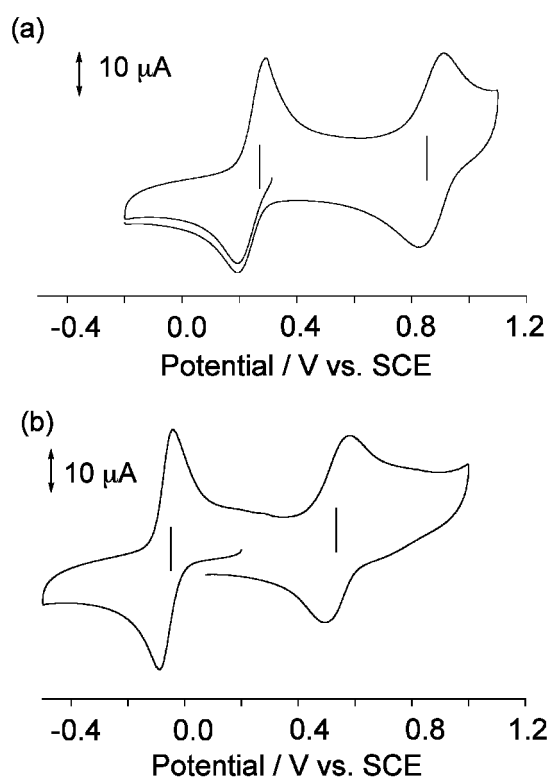

**Fig. S4.** Cyclic voltammograms of  $[2](\text{ClO}_4)_2$  in 0.1 mol dm<sup>-3</sup> phosphate buffer solutions at pH 1.67 (a), and 7.87 (b).
